# Supplementary material
Source: PubMed Central journal article supplement (PMC5693620)

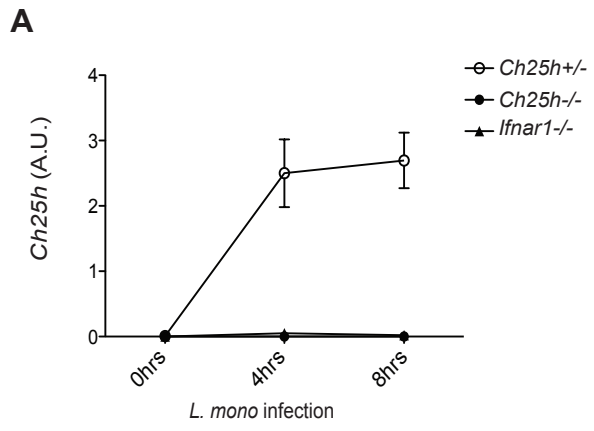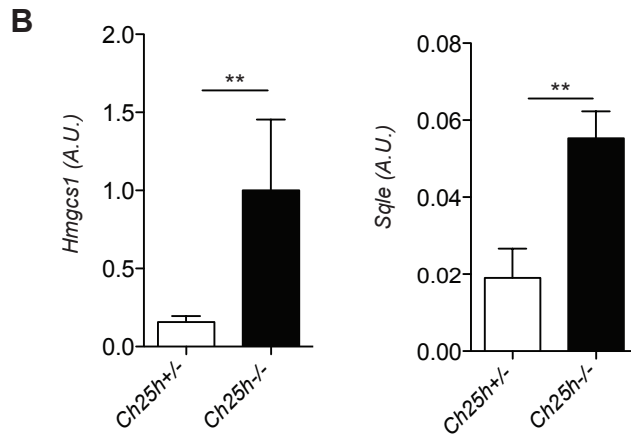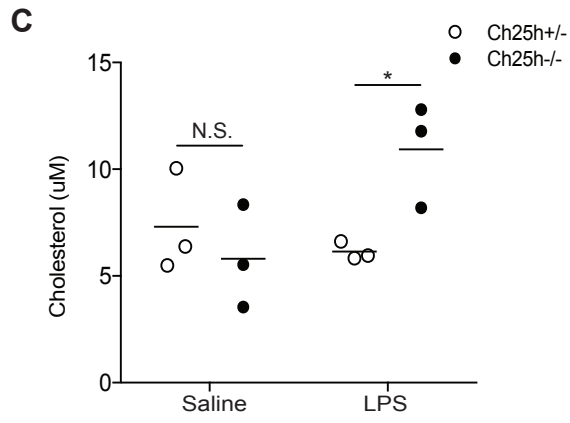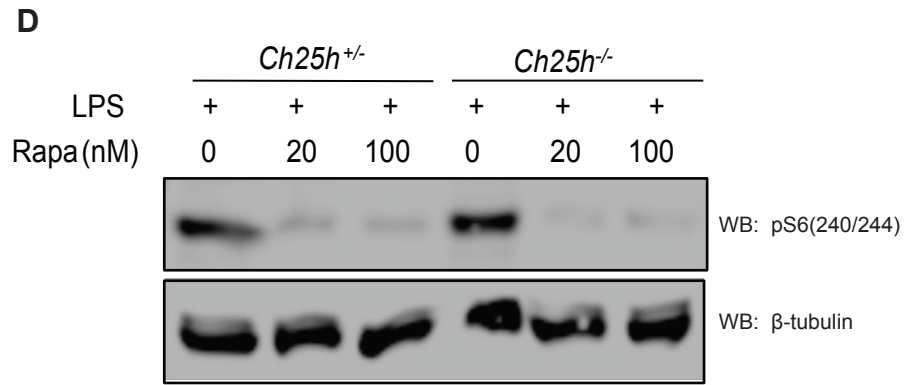

Supplement: NIHMS907790-supplement-S1.pdf [file NIHMS907790-supplement-S1.pdf]

**A**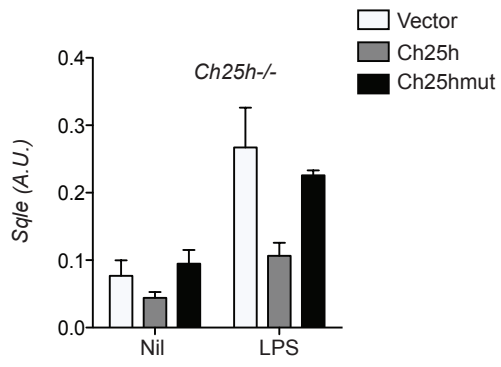**B**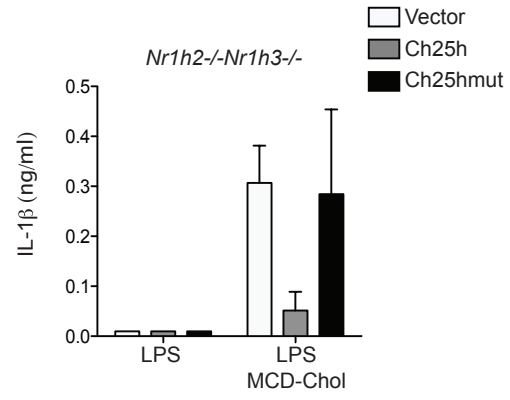

Supplement: NIHMS907790-supplement-S2.pdf [file NIHMS907790-supplement-S2.pdf]

**A**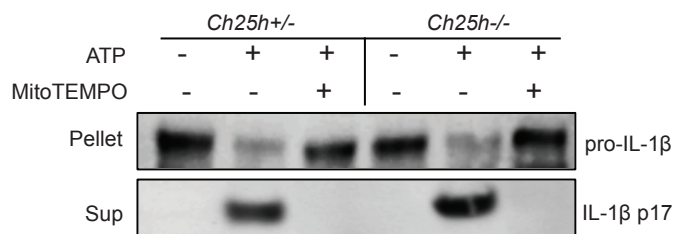**B**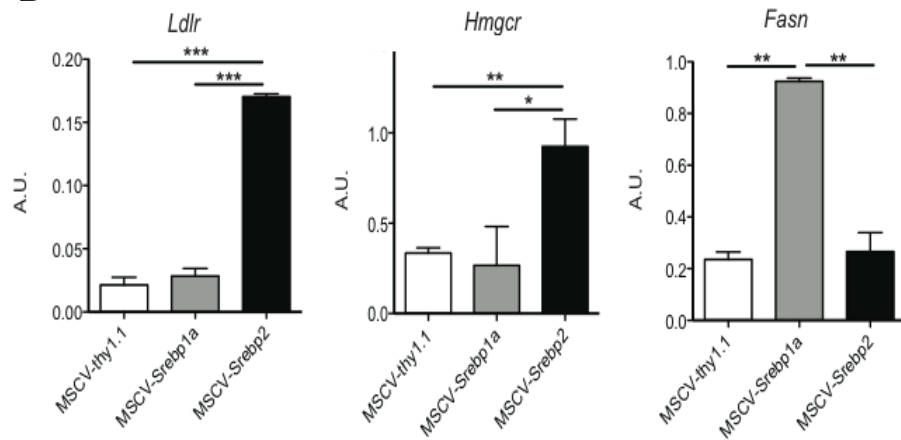**C**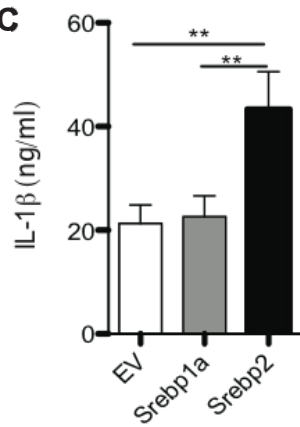**D**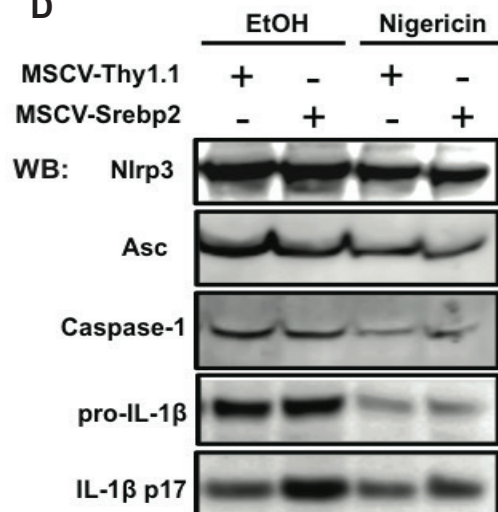

Supplement: NIHMS907790-supplement-S3.pdf [file NIHMS907790-supplement-S3.pdf]

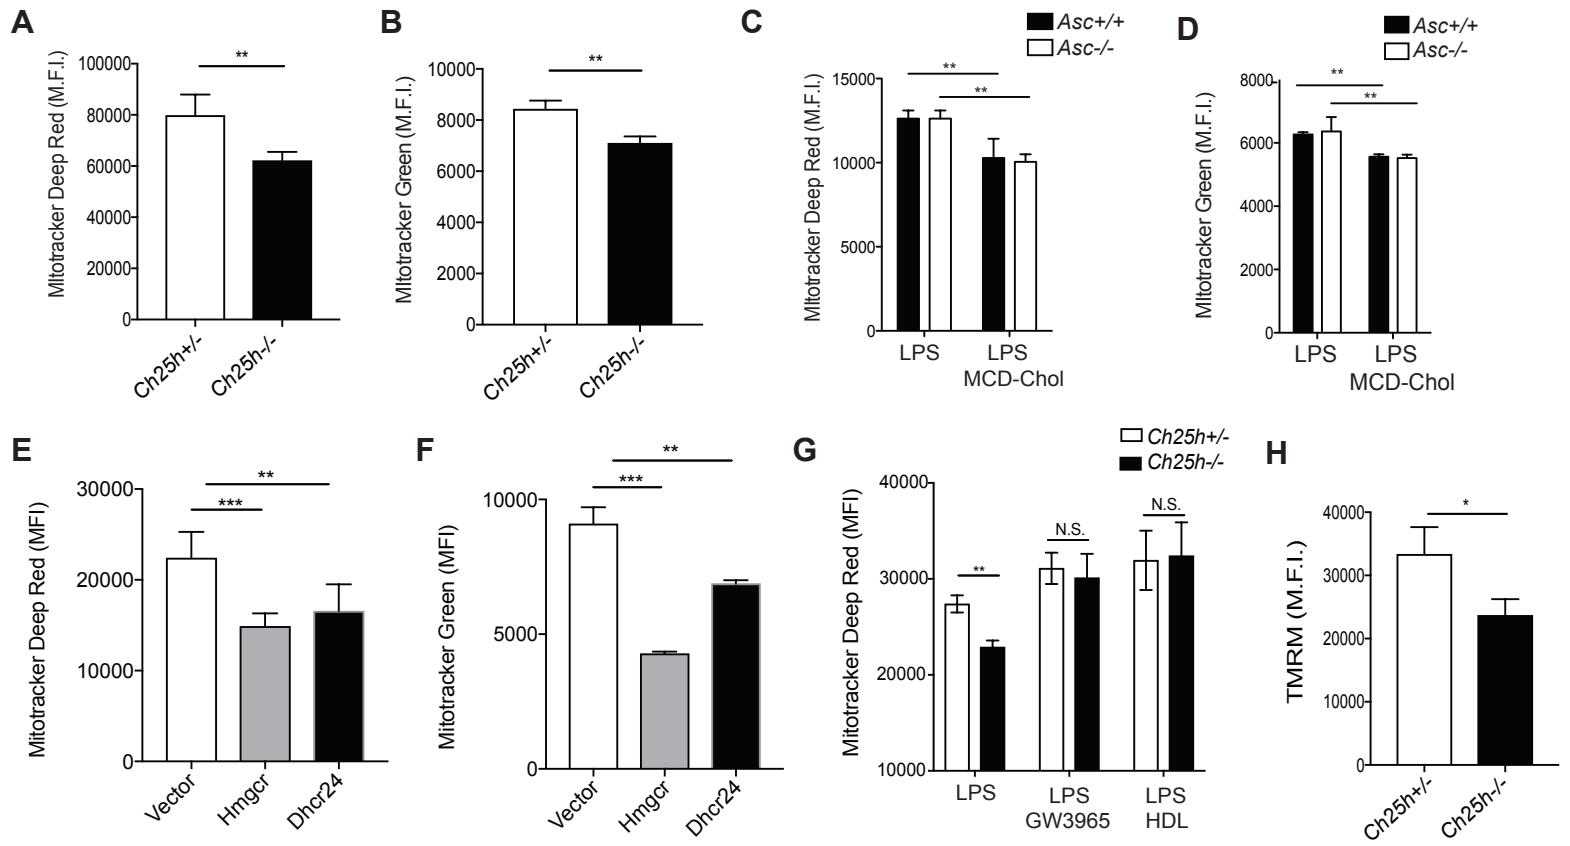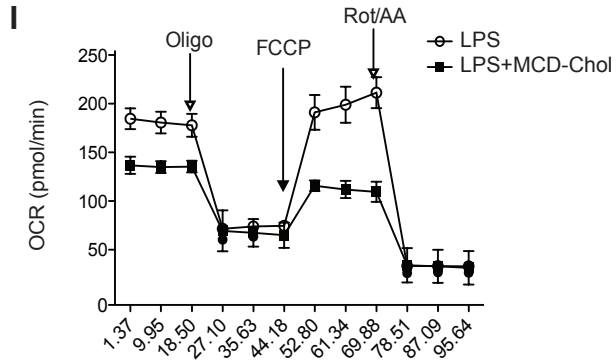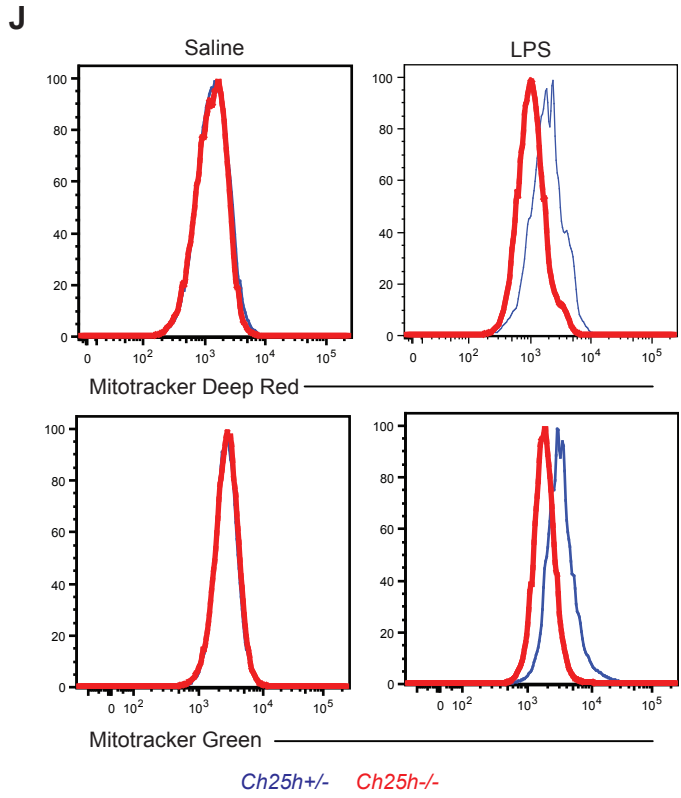

*Ch25h*<sup>+/+</sup> *Ch25h*<sup>-/-</sup>

Supplement: NIHMS907790-supplement-S4.pdf [file NIHMS907790-supplement-S4.pdf]

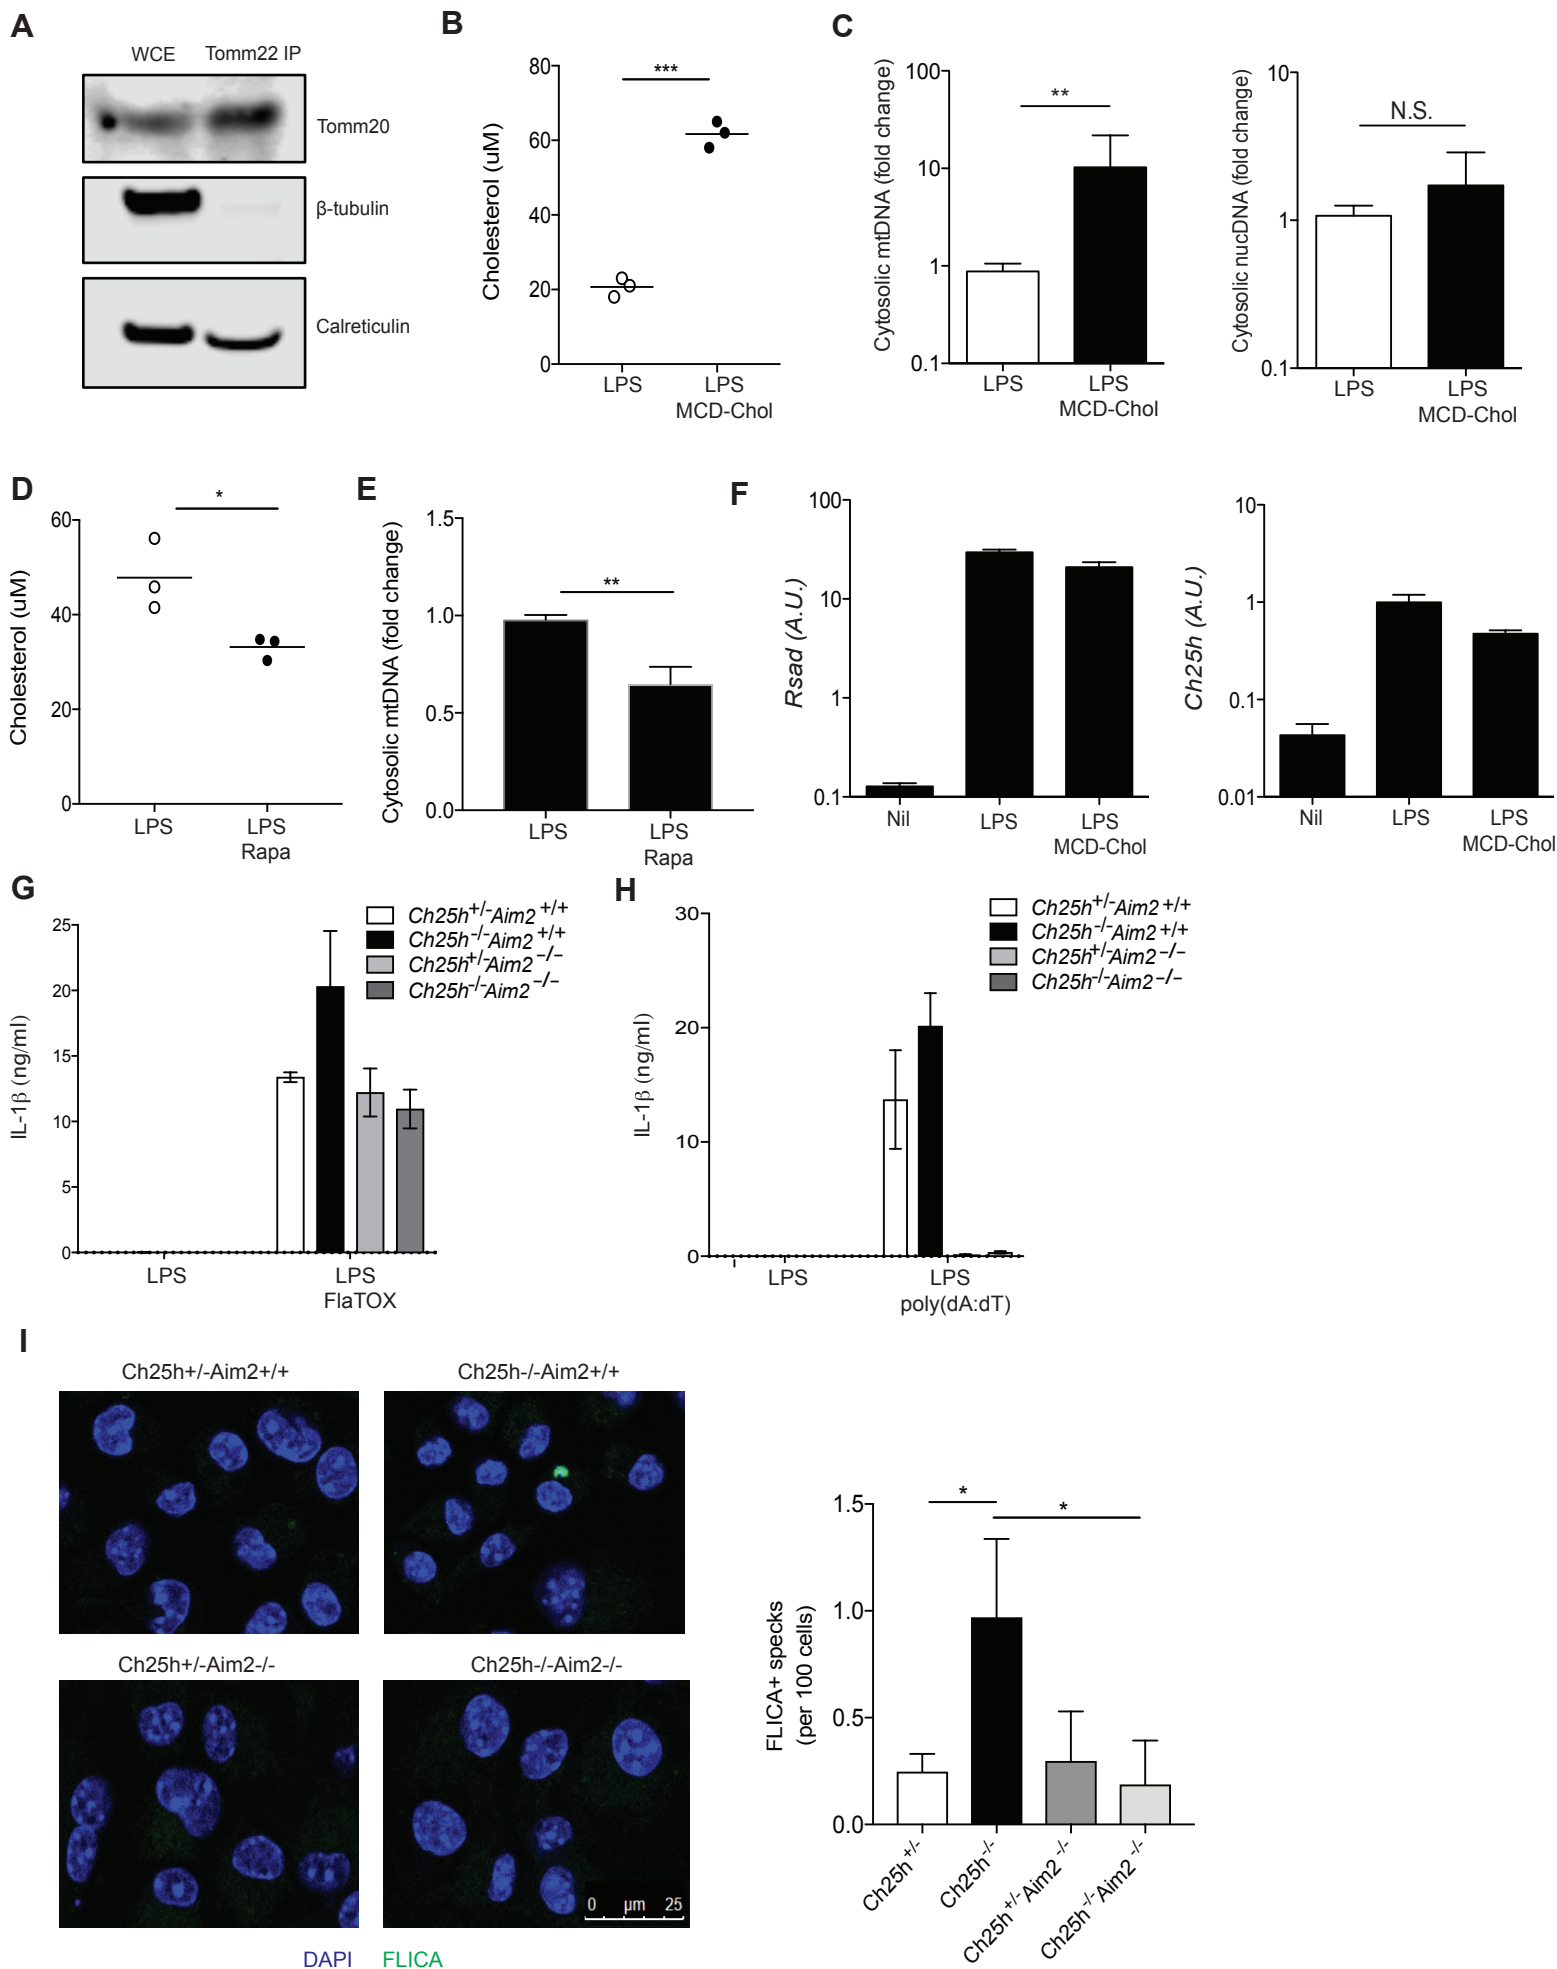

Supplement: NIHMS907790-supplement-S5.pdf [file NIHMS907790-supplement-S5.pdf]
